# Supplementary material for: Comprehensive benchmarking of density matrix functional approximations
Source: Royal Society of Chemistry journal article supplement (doi:10.1039/c7cp03349d), 2017-01-01
Supplement: c7cp03349d1.pdf [file c7cp03349d1.pdf]

# Supplementary Information

## Comprehensive Benchmarking for Density Matrix Functional Approximations

M. Rodríguez-Mayorga,<sup>†,‡</sup> Eloy Ramos-Cordoba,<sup>†,¶</sup> M. Via-Nadal,<sup>†</sup> M. Piris,<sup>†,§</sup>  
and Eduard Matito<sup>\*,†,§</sup>

<sup>†</sup>*Kimika Fakultatea, Euskal Herriko Unibertsitatea, UPV/EHU, and Donostia  
International Physics Center (DIPC). P.K. 1072, 20080 Donostia, Euskadi, Spain*

<sup>‡</sup>*Institut de Química Computacional i Catàlisi (IQCC) and Departament de Química,  
University of Girona, 17071 Girona, Catalonia, Spain*

<sup>¶</sup>*Currently at Kenneth S. Pitzer Center for Theoretical Chemistry, University of  
California, Berkeley*

<sup>§</sup>*IKERBASQUE, Basque Foundation for Science, 48011 Bilbao, Spain.*

E-mail: [ematito@gmail.com](mailto:ematito@gmail.com)

### 1 $\alpha(\omega)$ optimization for the POWER<sup>1-3</sup> Functional

The best  $\alpha(\omega)$  parameters were obtained by taking the two-electron integrals in the basis of natural orbitals and first scanning the interval  $0 \leq \alpha \leq 1$ . Then selecting the best alpha iteratively reducing the size of the interval until the error was  $\leq 10^{-5}$ . The exact  $V_{ee}$ , the best  $\alpha$  and the errors are collected in Table 1.

Table 1:  $\alpha(\omega)$  values which minimize the difference  $V_{ee}^{POWER} - V_{ee}$

| $\omega$  | $V_{ee}$ (a.u.) | $\alpha$ |
|-----------|-----------------|----------|
| 0.03      | 0.07564         | 0.540430 |
| 0.033     | 0.08052         | 0.539340 |
| 0.036     | 0.08524         | 0.538200 |
| 0.0365373 | 0.08607         | 0.538020 |
| 0.04      | 0.09132         | 0.537110 |
| 0.05      | 0.10563         | 0.536140 |
| 0.06      | 0.11891         | 0.536110 |
| 0.08      | 0.14319         | 0.535190 |
| 0.10      | 0.16523         | 0.534120 |
| 0.15      | 0.21376         | 0.531544 |
| 0.20      | 0.25600         | 0.529410 |
| 0.30      | 0.32880         | 0.526060 |
| 0.40      | 0.39157         | 0.523610 |
| 0.50      | 0.44762         | 0.521657 |
| 1.00      | 0.67184         | 0.516090 |
| 2.00      | 0.99493         | 0.511085 |
| 5.00      | 1.64342         | 0.506484 |
| 10.0      | 2.37889         | 0.502882 |
| 100.0     | 7.82805         | 0.493154 |
| 1000.0    | 25.0768         | 0.474605 |

## 2 Exact DI

The exact value of the DI between regions  $A$  and  $B$  is plotted in Figure 1. The decay of the DI with  $\omega^{-1/2}$  is due to two effects: the less compact electronic density which is produced by the weakening of the harmonic confinement and the enhanced role of the electron-electron repulsion.

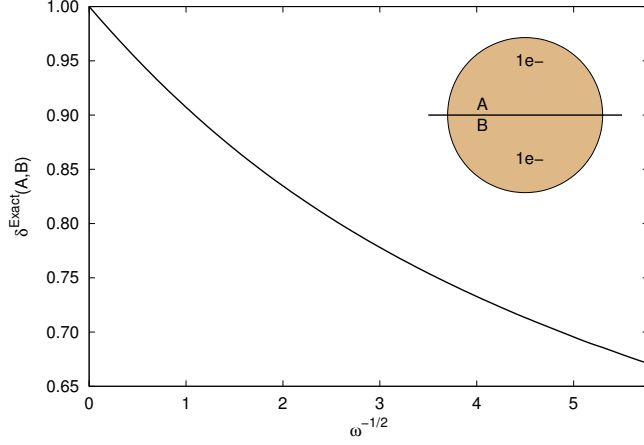

Figure 1: Exact delocalization index between regions  $A$  and  $B$  against  $\omega^{-1/2}$ .

### 3 Short-range radial intracule density for $\omega = 0.03$

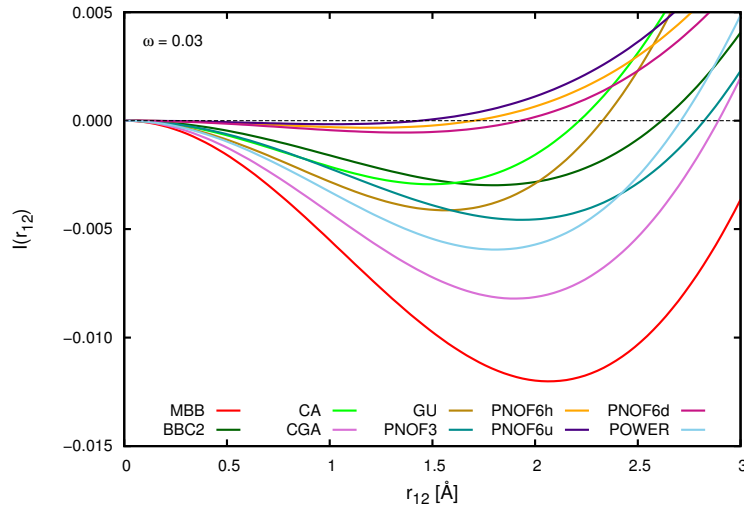

Figure 2: Radial intracule density (Eq. 16 in the text) against  $r_{12}$  for  $\omega = 0.03$ . ML, MLSIC, PNOF2, PNOF4 and SD have been not included because they do not present negative radial intracule density values.

Where MBB, BBC2, CA, CGA, GU, PNOF3, PNOF6 and the POWER functionals produce negative radial intracule densities for small  $r_{12}$  values.

## References

- (1) Cioslowski, J.; Pernal, K. Constraints upon natural spin orbital functionals imposed by properties of a homogeneous electron gas. *J. Chem. Phys.* **1999**, *111*, 3396–3400.
- (2) Cioslowski, J.; Pernal, K. Description of a homogeneous electron gas with simple functionals of the one-particle density matrix. *Phys. Rev. A* **2000**, *61*, 034503.
- (3) Sharma, S.; Dewhurst, J. K.; Lathiotakis, N. N.; Gross, E. K. Reduced density matrix functional for many-electron systems. *Phys. Rev. B* **2008**, *78*, 201103.
